# Supplementary material for: Insights into Non-Proteolytic Inhibitory Mechanisms of Polymorphic Early-Stage Amyloid β Oligomers by Insulin Degrading Enzyme
Source: MDPI journal article supplement (doi:10.3390/biom12121886), 2022-12-16
Supplement: s1 [file s1]

Supporting Information for

**“Insights into non-proteolytic inhibitory mechanisms of polymorphic early-stage amyloid  $\beta$  oligomers by insulin degrading enzyme”**

Karina Abramov-Harpaz<sup>1,2,3</sup> Yifat Miller<sup>1,2,3\*</sup>

<sup>1</sup>*Department of Chemistry, Ben-Gurion University of the Negev, P.O. Box 653, Be'er Sheva 84105, Israel*

<sup>2</sup>*The School of Brain Sciences and Cognition, Ben-Gurion University of the Negev, Beér-Sheva 84105, Israel*

<sup>3</sup>*Ilse Katz Institute for Nanoscale Science and Technology, Ben-Gurion University of the Negev, Beér-Sheva 84105, Israel*

Corresponding author:

\*Yifat Miller: [ymiller@bgu.ac.il](mailto:ymiller@bgu.ac.il)

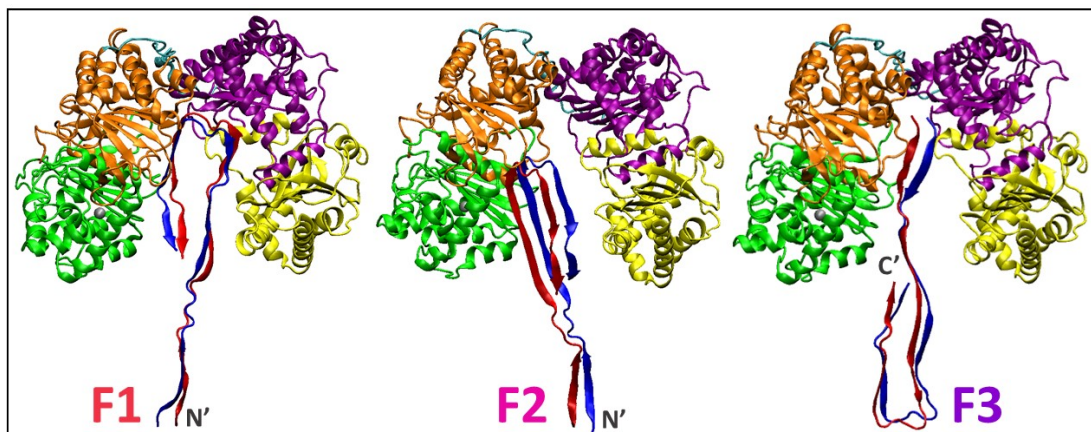

**Figure S1:** Three initial minimized structures of IDE-A $\beta$  fibril-like dimer complexes that differ by the insertion of A $\beta$  fibril-like dimer in 3 different orientations. In model F1 – the C-termini domains of A $\beta$  dimer were inserted towards the IDE-C domain. In model F2 – the C-termini domains of A $\beta$  dimer were inserted towards IDE-N domain. In model F3 – the N-termini domain of A $\beta$  dimer were inserted both to IDE-N and IDE-C domains.

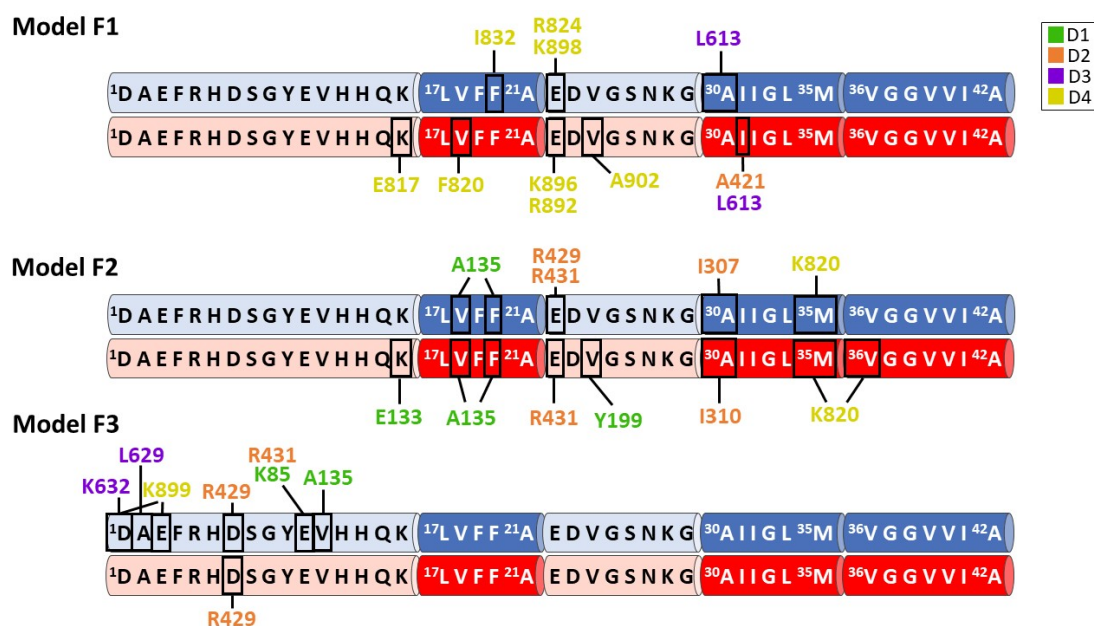

**Figure S2:** The residues of IDE within the four domains (domain 1: green; domain 2: orange; domain 3: purple; domain 4: yellow) that bind residues in A $\beta$  fibril-like dimer in three models: F1, F2 and F3.

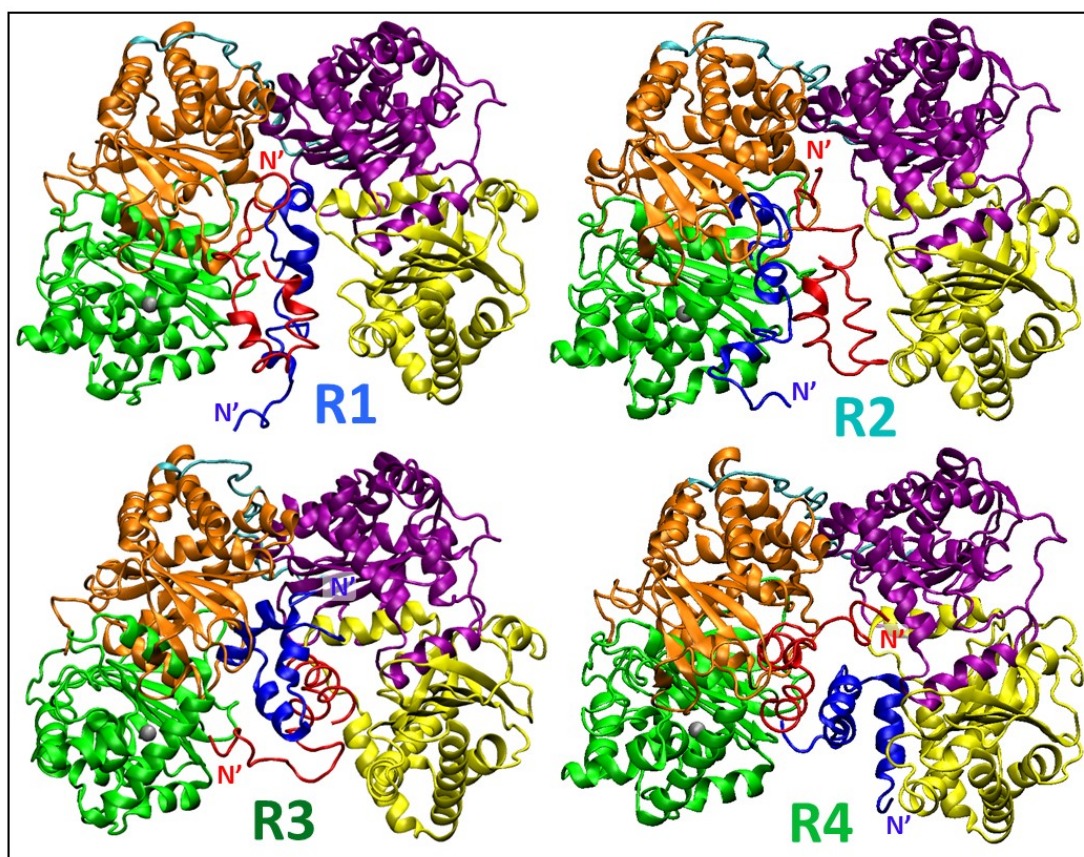

**Figure S3:** Four initial minimized structures of IDE-A $\beta$  random coil/ $\alpha$ -helix dimer complexes. In models R1 and R2, the random coil/ $\alpha$ -helix dimer (model D1) was inserted into the IDE in two different orientations. In models R3 and R4, the random coil/ $\alpha$ -helix dimer (model D4) was inserted into the IDE in two different orientations. Models D1 and D4 of the random coil/ $\alpha$ -helix A $\beta$  dimer were taken from: Press-Sandler, O.; Miller, Y., Distinct Primary Nucleation of Polymorphic A $\beta$  Dimers Yields to Distinguished Fibrillation Pathways. *ACS Chem. Neurosci.* 2019, 10, 4407-4413.



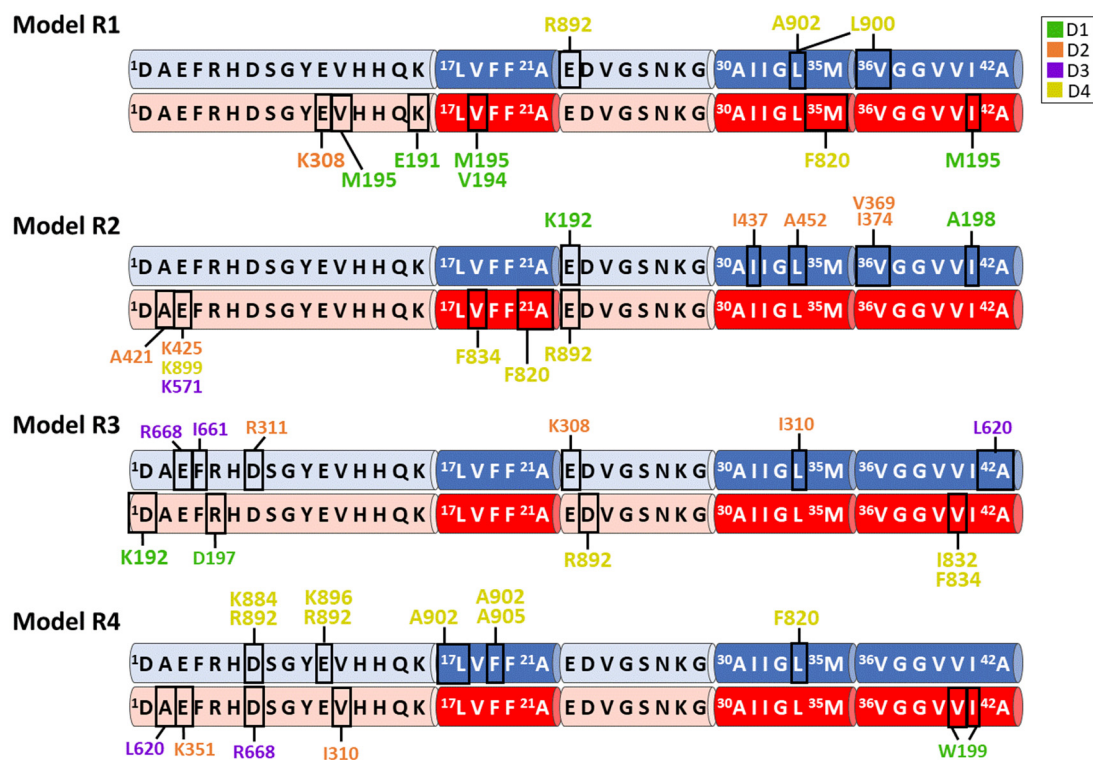

**Figure S4:** The residues of IDE within the four domains (domain 1: green; domain 2: orange; domain 3: purple; domain 4: yellow) that bind residues in A $\beta$  random coil/ $\alpha$ -helix dimer in four models: R1, R2, R3, and R4.

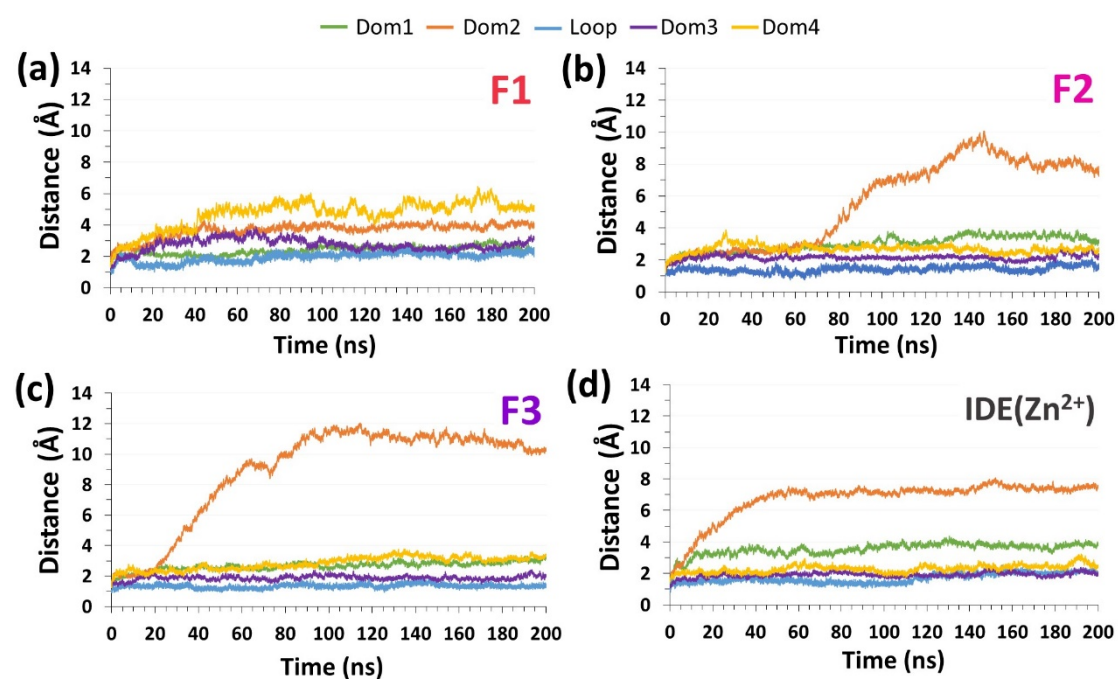

**Figure S5:** The root-mean-square deviations (RMSDs) values of IDE domains along the MD simulations for the models (a) F1 (b) F2 (c) F3, and (d) IDE in absence of A $\beta$  dimer: domain 1 (color: green), domain 2 (color: orange), loop (color: cyan), domain 3 (color: purple), domain 4 (color: yellow).

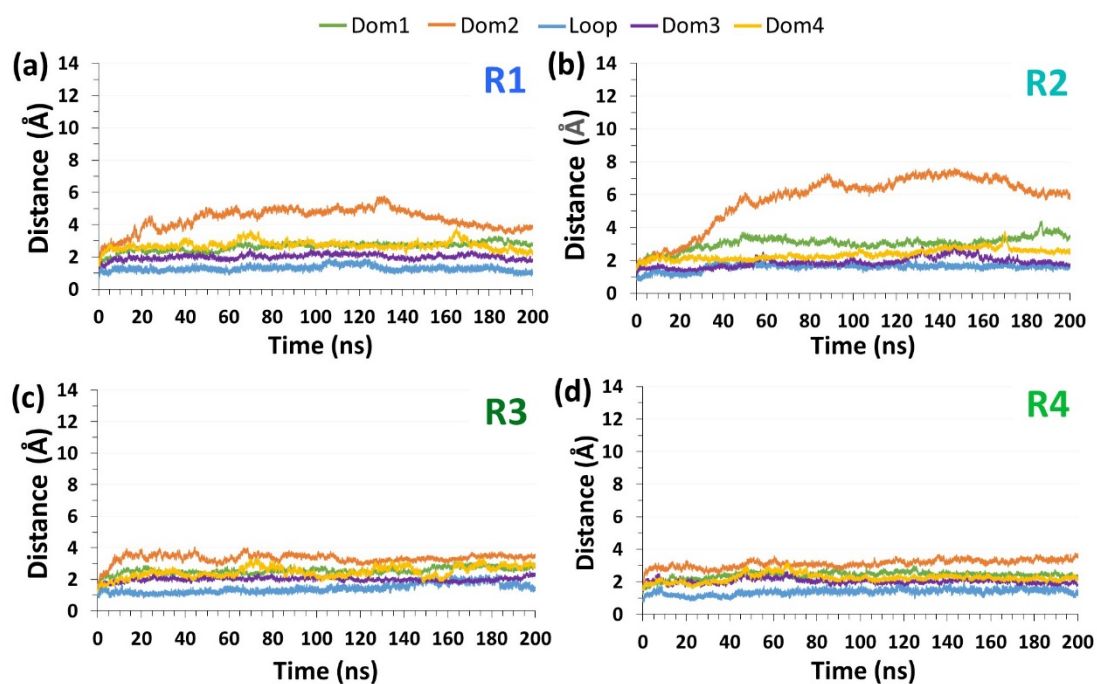

**Figure S6:** The root-mean-square deviations (RMSDs) values of IDE domains along the MD simulations for the models (a) R1, (b) R2, (c) R3, and (d) R4: domain 1 (color: green), domain 2 (color: orange), loop (color: cyan), domain 3 (color: purple), domain 4 (color: yellow).

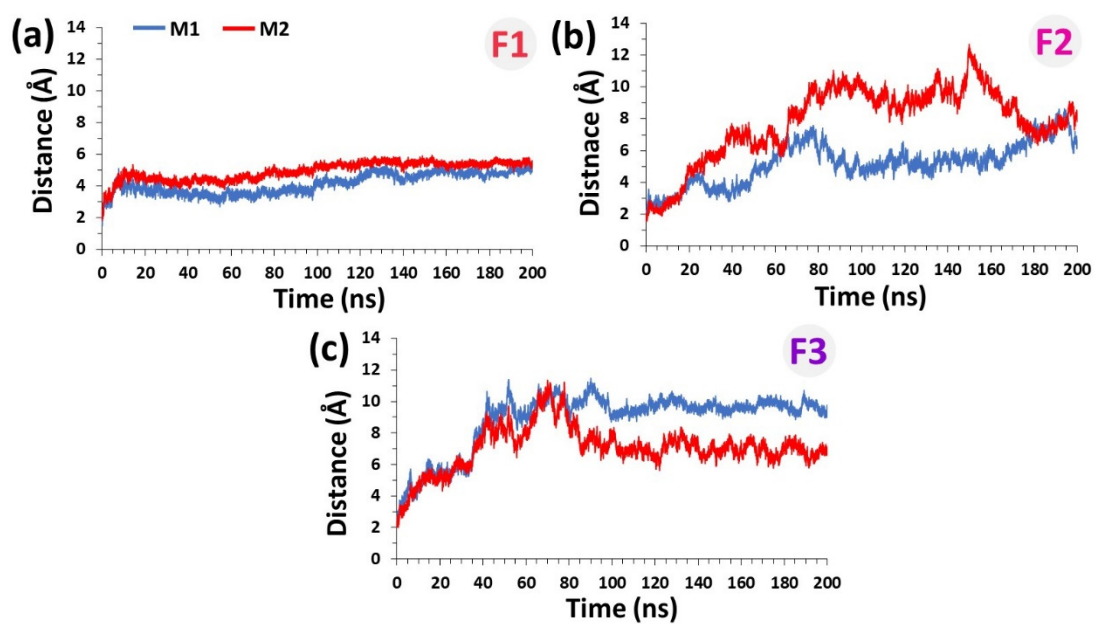

**Figure S7:** The root-mean-square deviations (RMSDs) values for A $\beta$  dimers in models: (a) F1, (b) F2, and (c) F3, along the MD simulations.

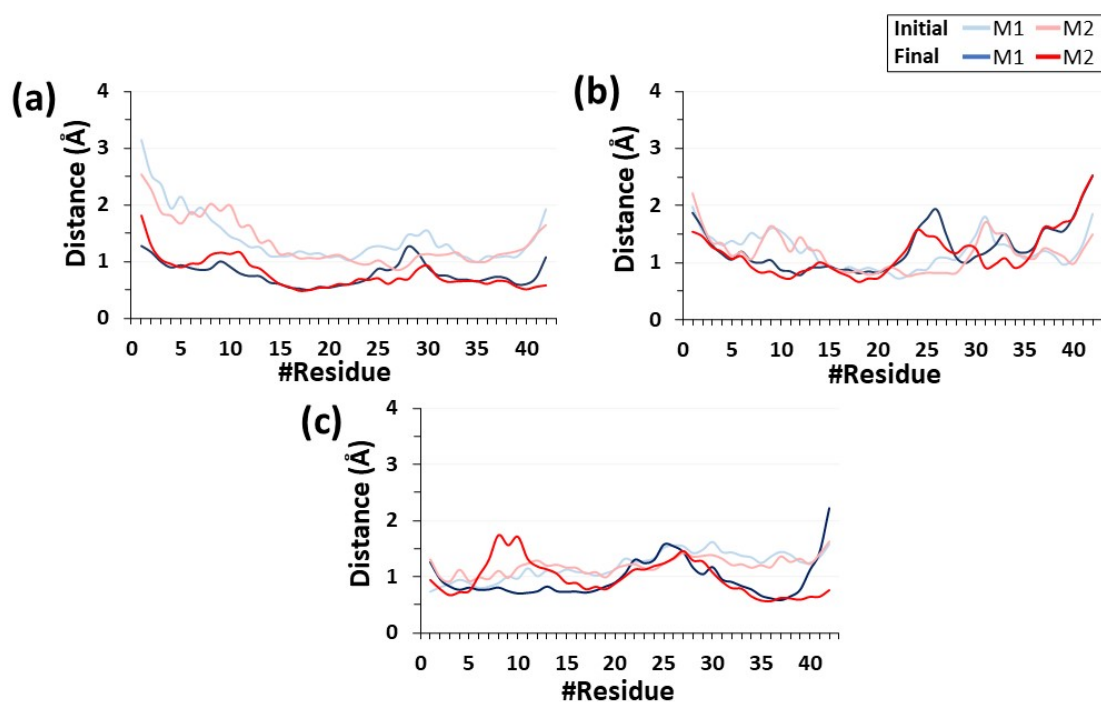

**Figure S8:** Root-mean-square fluctuations (RMSFs) of A $\beta$  monomers M1 and M2 within each dimer, in the first 5 ns (initial) and last 5 ns (final) of the MD simulations for models: (a) F1, (b) F2, and (c) F3.



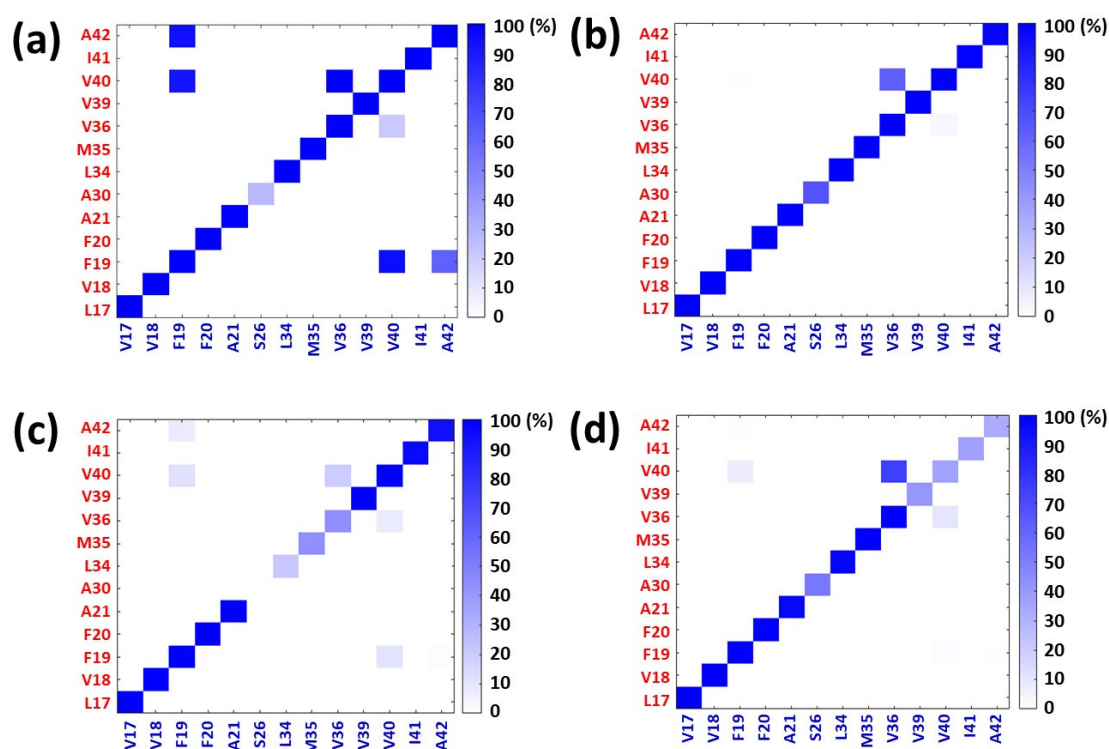

**Figure S9:** Percentage occurrence maps of hydrophobic interactions between two monomers, computed from MD simulations for (a) Aβ in solution in absence of IDE (taken from: Press-Sandler, O.; Miller, Y., Distinct Primary Nucleation of Polymorphic Aβ Dimers Yields to Distinguished Fibrillation Pathways. *ACS Chem. Neurosci.* 2019, 10, 4407-4413), (b) Aβ in model F1 (c) Aβ in model F2, and (d) Aβ in model F3.

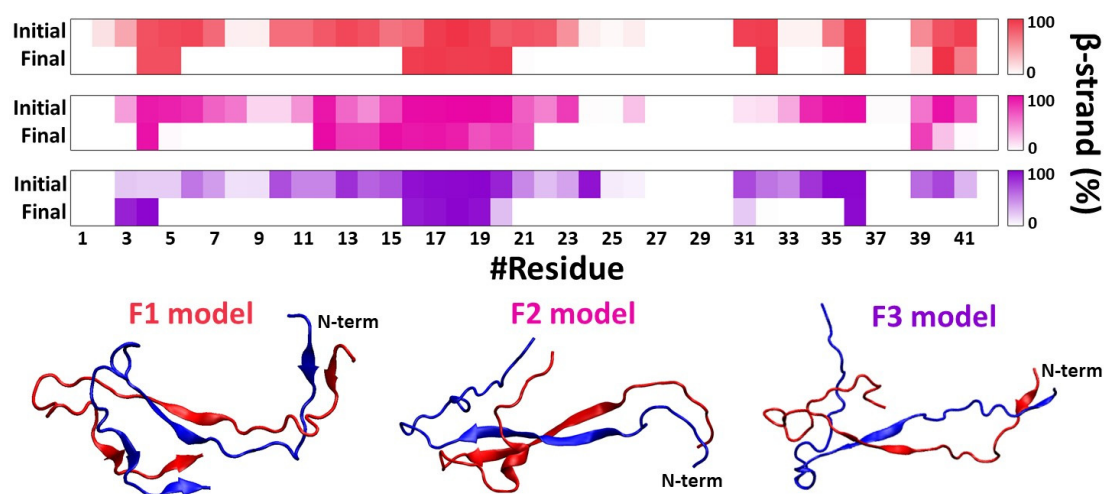

**Figure S10:** Top: DSSP analysis of the location of  $\beta$ -strands along the sequence of A $\beta$  monomers in the simulated models: F1 (color: red), F2 (color: pink) and F3 (color: purple). The DSSP analyses were measured along the first 5 ns (initial), and the last 5 ns (final) of the MD simulations. Bottom: Final simulated structures of A $\beta$  dimers for each of 3 different models: F1, F2 and F3.

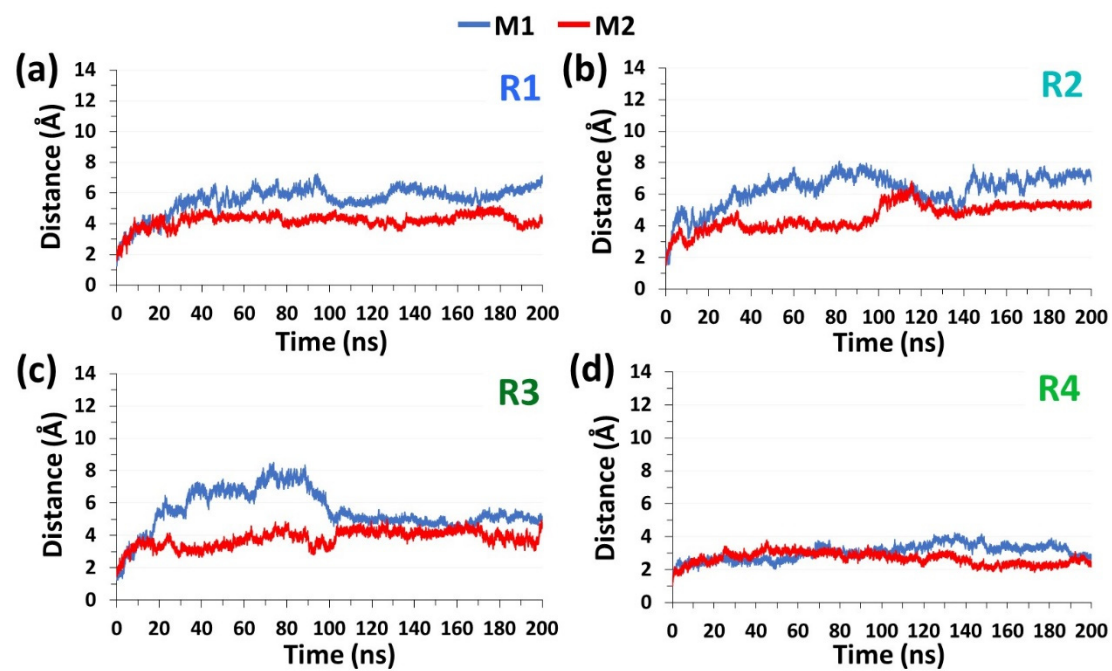

**Figure S11:** The root-mean-square deviations (RMSDs) values for A $\beta$  dimers in models: (a) R1, (b) R2, (c) R3, and (d) R4, along the MD simulations.

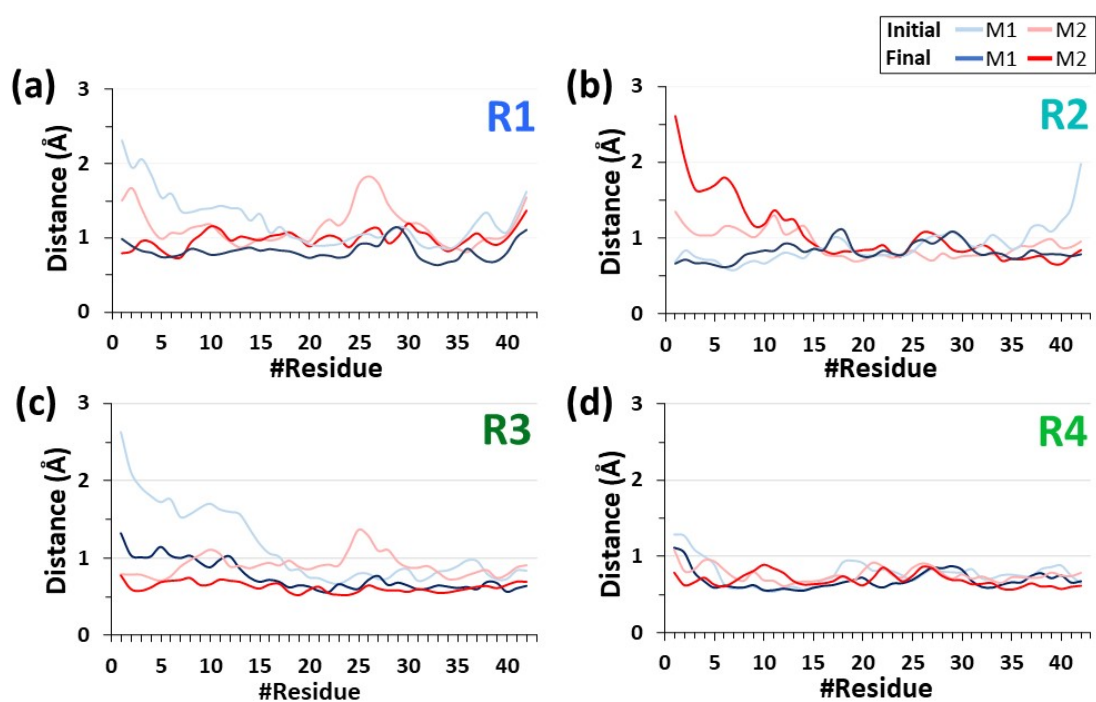

**Figure S12:** Root-mean-square fluctuations (RMSFs) of A $\beta$  monomers M1 and M2 within each dimer, in the first 5 ns (initial) and last 5 ns (final) of the MD simulations for models: (a) R1, (b) R2, (c) R3, and (d) R4.

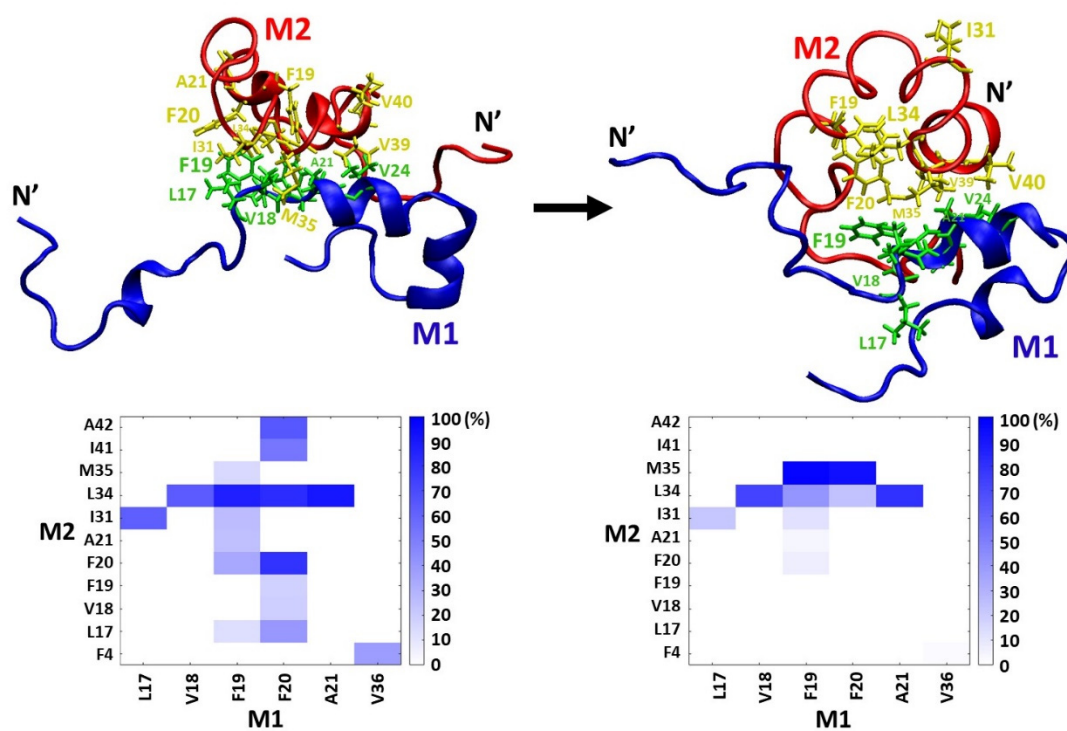

**Figure S13:** Structure of Aβ dimer – model D1 (top), and percentage occurrence maps of hydrophobic interactions between two monomers, computed from MD simulations for Aβ in solution in absence of IDE (left) (taken from: Press-Sandler, O.; Miller, Y., Distinct Primary Nucleation of Polymorphic Aβ Dimers Yields to Distinguished Fibrillation Pathways. *ACS Chem. Neurosci.* 2019, 10, 4407-4413), and in model R1 (right).



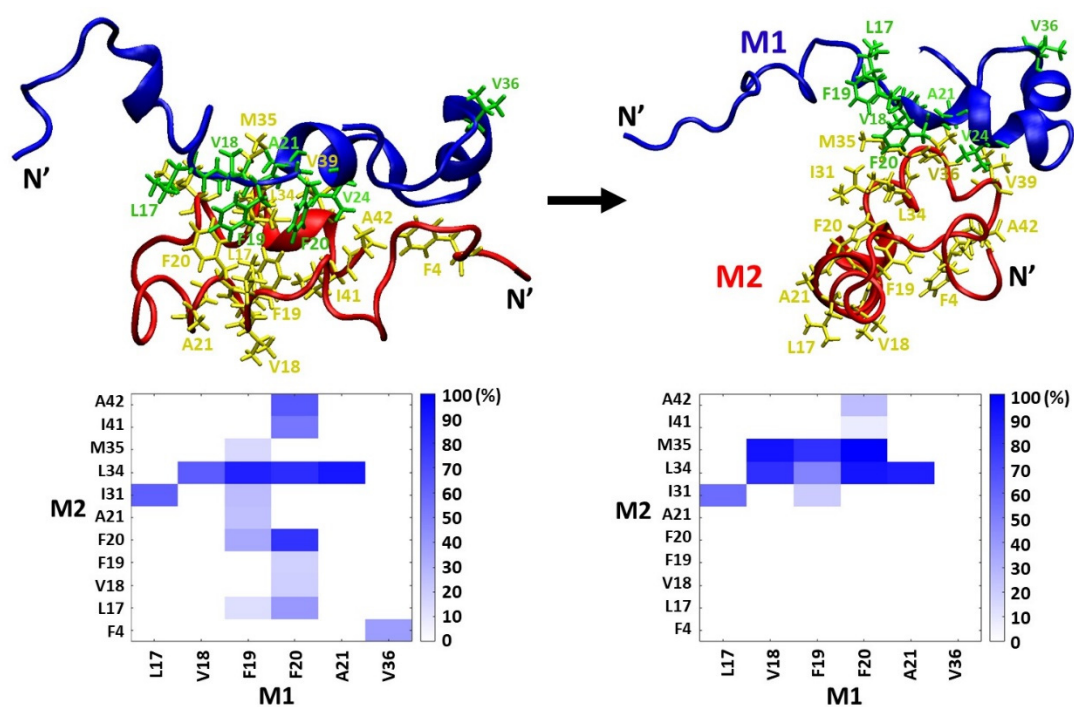

**Figure S14:** Structure of Aβ dimer – model D1 (top), and percentage occurrence maps of hydrophobic interactions between two monomers, computed from MD simulations for Aβ in solution in absence of IDE (left) (taken from: Press-Sandler, O.; Miller, Y., Distinct Primary Nucleation of Polymorphic Aβ Dimers Yields to Distinguished Fibrillation Pathways. *ACS Chem. Neurosci.* 2019, 10, 4407-4413), and in model R2 (right).

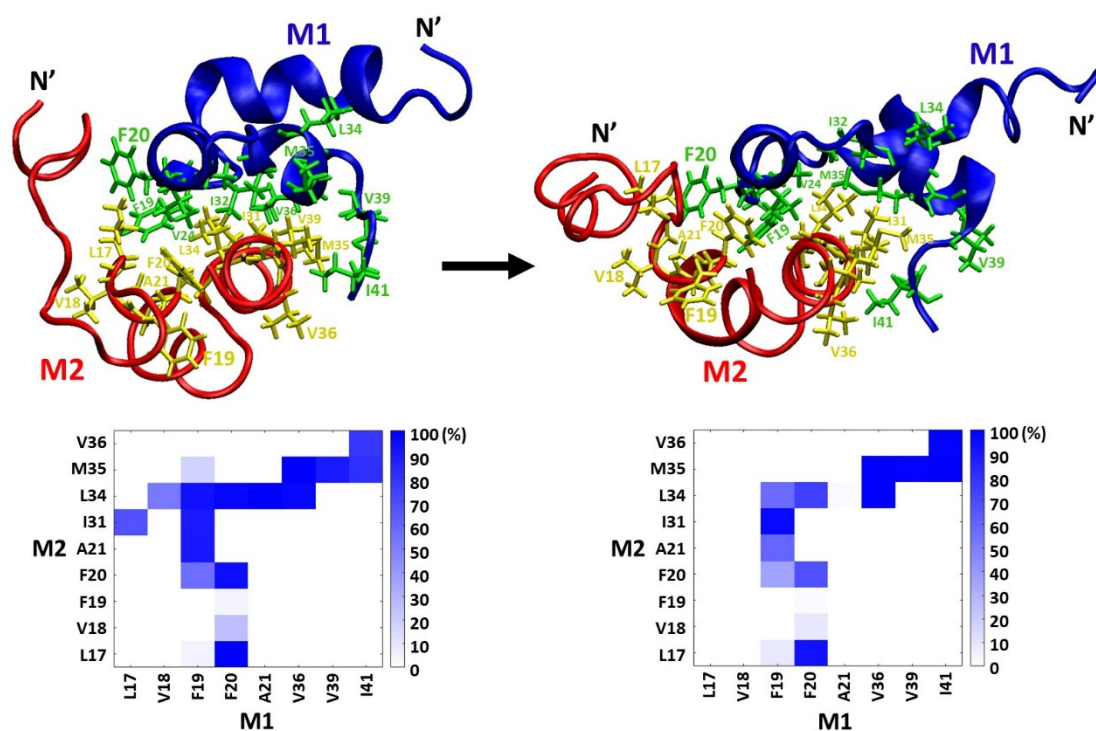

**Figure S15:** Structure of Aβ dimer – model D4 (top), and percentage occurrence maps of hydrophobic interactions between two monomers, computed from MD simulations for Aβ in solution in absence of IDE (left) (taken from: Press-Sandler, O.; Miller, Y., Distinct Primary Nucleation of Polymorphic Aβ Dimers Yields to Distinguished Fibrillation Pathways. *ACS Chem. Neurosci.* 2019, 10, 4407-4413), and in model R3 (right).

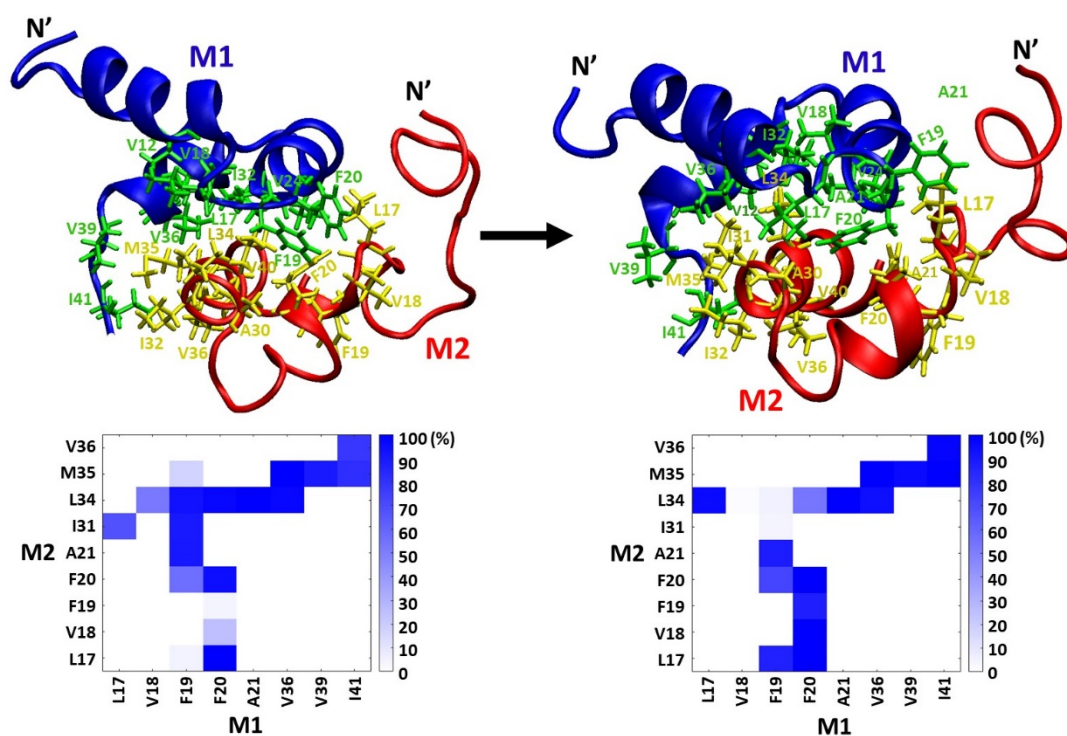

**Figure S16:** Structure of Aβ dimer – model D4 (top), and percentage occurrence maps of hydrophobic interactions between two monomers, computed from MD simulations for Aβ in solution in absence of IDE (left) (taken from: Press-Sandler, O.; Miller, Y., Distinct Primary Nucleation of Polymorphic Aβ Dimers Yields to Distinguished Fibrillation Pathways. *ACS Chem. Neurosci.* 2019, 10, 4407-4413), and in model R4 (right).

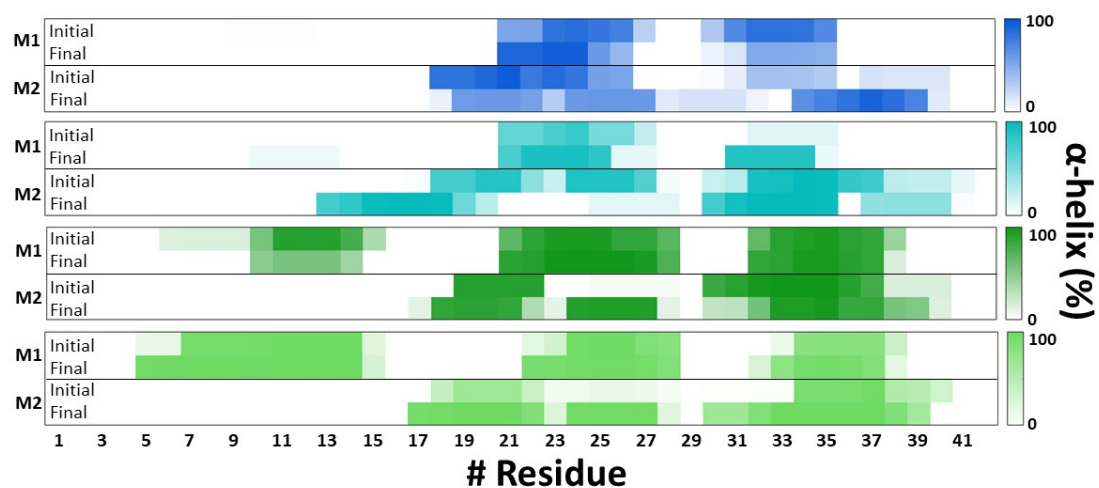

**Figure S17:** DSSP analysis of the location of  $\alpha$ -helices along the sequence of A $\beta$  monomers in the simulated models: R1 (color: blue), R2 (color: cyan), R3 (color: dark green), and R4 (color: light green). The DSSP analyses were measured along the first 5 ns (initial), and the last 5 ns (final) of the MD simulations.

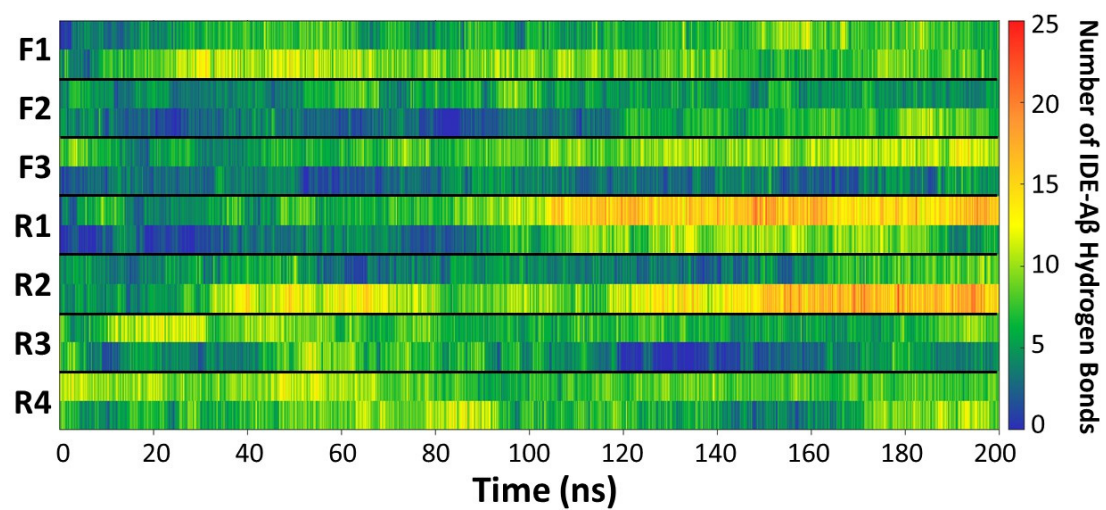

**Figure S18:** Total number of hydrogen bonds between IDE and A $\beta$  monomers for all models, along the MD simulations.



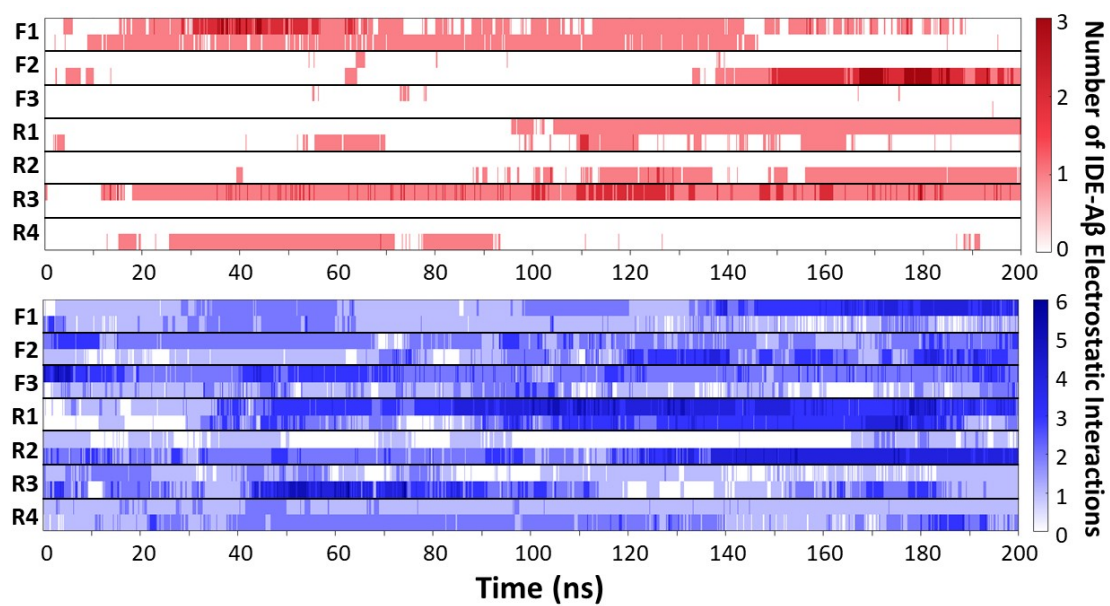

**Figure S19:** Total number of electrostatic interactions between negative residues (color: red) and positive residues (color: blue) of IDE and A $\beta$  monomers for all models, along the MD simulations.

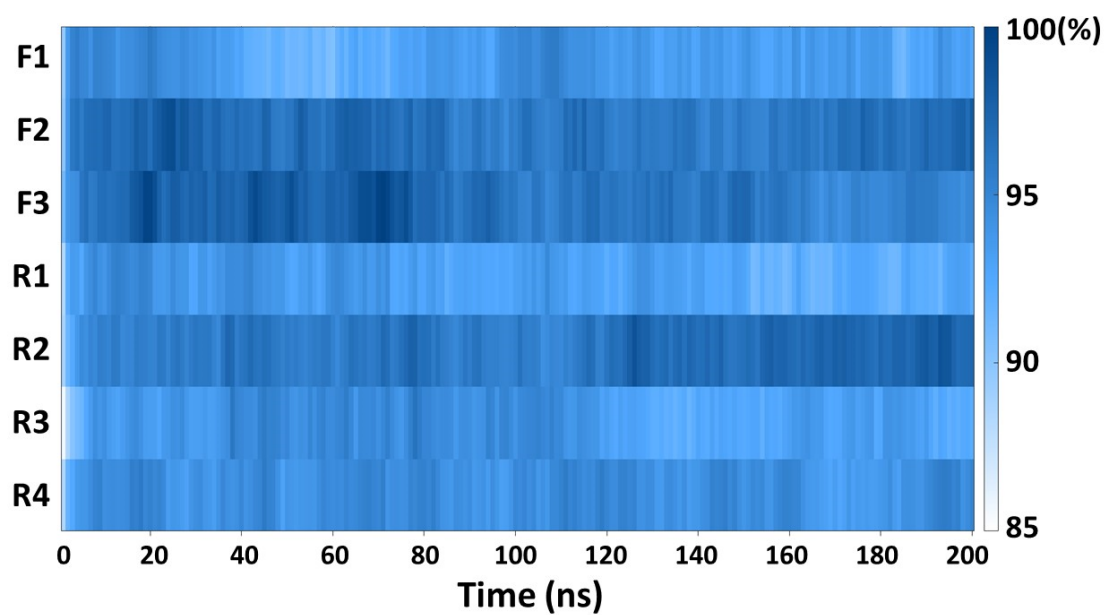

**Figure S20:** Solvation by water molecules of IDE along the MD simulations for all models. The solvation was normalized to percentages according to the highest number of water molecules.

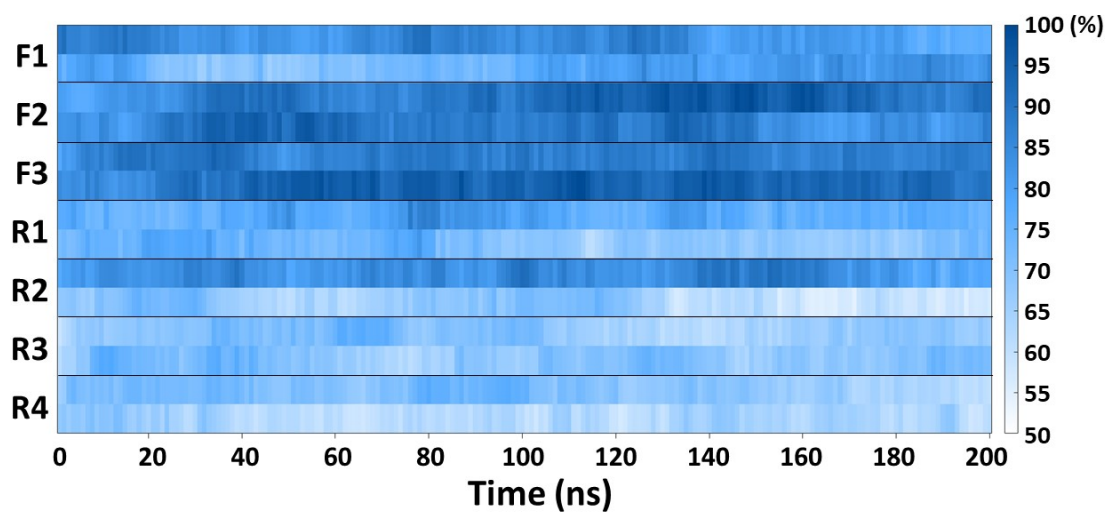

**Figure S21:** Solvation by water molecules of A $\beta$  monomers along the MD simulations for all models. The solvation was normalized to percentages according to the highest number of water molecules.
